# Supplementary material for: Two cyclometalated Pt(ii) complexes showing reversible phosphorescence switching due to grinding-induced destruction and crystallization-induced formation of supramolecular dimer structure
Source: Royal Society of Chemistry journal article supplement (doi:10.1039/d1ra07142d), 2021-12-21
Supplement: d1ra07142d1.pdf [file d1ra07142d1.pdf]

## Electronic Supporting Information

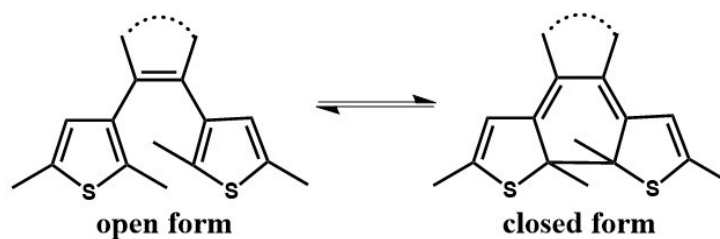

**Scheme S1** Structural transition between open form and closed form for dithienylethene (DTE).

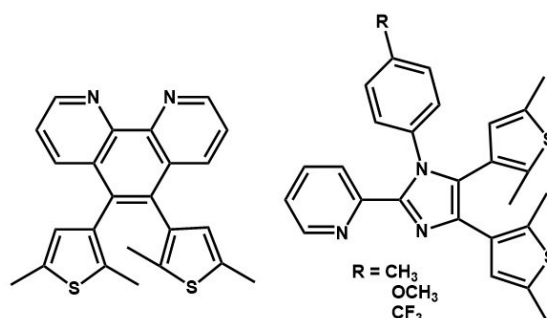

**Scheme S2** The molecular structures of the reported DTE-based N<sup>N</sup> ancillary ligands in references 23 and 25 in the main text.

**Table S1** Crystallographic data and refinement for **1** and **2**·C<sub>7</sub>H<sub>8</sub>

|                                                                                          | <b>1</b>                                                                         | <b>2</b> ·C <sub>7</sub> H <sub>8</sub>                                          |
|------------------------------------------------------------------------------------------|----------------------------------------------------------------------------------|----------------------------------------------------------------------------------|
| Formula                                                                                  | C <sub>32</sub> H <sub>27</sub> N <sub>4</sub> F <sub>8</sub> PS <sub>2</sub> Pt | C <sub>39</sub> H <sub>37</sub> N <sub>4</sub> F <sub>6</sub> PS <sub>2</sub> Pt |
| <i>M</i>                                                                                 | 909.75                                                                           | 965.90                                                                           |
| Crystal system                                                                           | Monoclinic                                                                       | Monoclinic                                                                       |
| Space group                                                                              | <i>P</i> 2 <sub>1</sub> / <i>n</i>                                               | <i>P</i> 2 <sub>1</sub> / <i>c</i>                                               |
| <i>T</i> /K                                                                              | 296(2)                                                                           | 193(2)                                                                           |
| <i>a</i> /Å                                                                              | 9.0408(5)                                                                        | 7.2607(3)                                                                        |
| <i>b</i> /Å                                                                              | 17.9156(8)                                                                       | 27.1529(10)                                                                      |
| <i>c</i> /Å                                                                              | 19.9292(9)                                                                       | 18.6030(8)                                                                       |
| <i>β</i> /°                                                                              | 96.929(2)                                                                        | 99.488(2)                                                                        |
| <i>V</i> /Å <sup>3</sup>                                                                 | 3204.4(3)                                                                        | 3617.4(3)                                                                        |
| <i>Z</i>                                                                                 | 4                                                                                | 4                                                                                |
| <i>D<sub>c</sub></i> /g cm <sup>-3</sup>                                                 | 1.886                                                                            | 1.774                                                                            |
| <i>F</i> (000)                                                                           | 1776                                                                             | 1912                                                                             |
| GooF on <i>F</i> <sup>2</sup>                                                            | 1.036                                                                            | 1.047                                                                            |
| <i>R</i> <sub>1</sub> , <i>wR</i> <sub>2</sub> [ <i>I</i> > 2σ( <i>I</i> )] <sup>a</sup> | 0.0378, 0.0758                                                                   | 0.0390, 0.0856                                                                   |
| <i>R</i> <sub>1</sub> , <i>wR</i> <sub>2</sub> (all data) <sup>a</sup>                   | 0.0601, 0.0823                                                                   | 0.0531, 0.0914                                                                   |
| (Δρ) <sub>max</sub> , (Δρ) <sub>min</sub> (e Å <sup>-3</sup> )                           | 1.011, -1.266                                                                    | 1.029, -1.052                                                                    |

<sup>a</sup>  $R_1 = \frac{\sum ||F_o| - |F_c||}{\sum |F_o|}$ .  $wR_2 = \frac{[\sum w(F_o^2 - F_c^2)^2 / \sum w(F_o^2)^2]}{1/2}$ .

**Table S2** Selected bond lengths (Å) and bond angles (°) for **1**

|            |            |            |          |
|------------|------------|------------|----------|
| Pt1-C1     | 2.002(5)   | Pt1-N3     | 2.111(4) |
| Pt1-N1     | 2.010(4)   | N3-C17     | 1.346(6) |
| Pt1-N2     | 2.040(4)   | N4-C17     | 1.358(6) |
| C1-Pt1-N1  | 79.75(19)  | C7-N1-Pt1  | 117.1(3) |
| C1-Pt1-N2  | 101.30(18) | C12-N2-Pt1 | 127.2(4) |
| N1-Pt1-N2  | 178.32(18) | C16-N2-Pt1 | 115.0(3) |
| C1-Pt1-N3  | 176.99(17) | C18-N3-Pt1 | 142.6(3) |
| N1-Pt1-N3  | 101.14(16) | C17-N3-Pt1 | 109.9(3) |
| N2-Pt1-N3  | 77.88(15)  | C2-C1-Pt1  | 130.5(4) |
| C11-N1-Pt1 | 124.1(3)   | C6-C1-Pt1  | 112.2(4) |

**Table S3** Selected bond lengths (Å) and bond angles (°) for **2**·C<sub>7</sub>H<sub>8</sub>

|            |            |            |          |
|------------|------------|------------|----------|
| Pt1-C1     | 2.008(5)   | Pt1-N3     | 2.124(4) |
| Pt1-N1     | 2.011(5)   | N3-C17     | 1.345(7) |
| Pt1-N2     | 2.050(4)   | N4-C17     | 1.361(7) |
| C1-Pt1-N1  | 79.8(2)    | C7-N1-Pt1  | 115.8(4) |
| C1-Pt1-N2  | 101.0(2)   | C12-N2-Pt1 | 126.3(4) |
| N1-Pt1-N2  | 178.73(18) | C16-N2-Pt1 | 115.4(3) |
| C1-Pt1-N3  | 177.02(19) | C17-N3-Pt1 | 111.0(4) |
| N1-Pt1-N3  | 101.76(18) | C18-N3-Pt1 | 142.0(4) |
| N2-Pt1-N3  | 77.39(17)  | C6-C1-Pt1  | 112.5(4) |
| C11-N1-Pt1 | 125.5(4)   | C2-C1-Pt1  | 131.6(4) |

**Table S4** Photophysical properties of **1**, **2** and pbdtmi in CH<sub>2</sub>Cl<sub>2</sub> at room temperature.

| Compound | Medium                                  | $\lambda_{\text{abs}}$ (nm) | $\lambda_{\text{em}}$ (nm) | Lifetime (ns)               | quantum yield |
|----------|-----------------------------------------|-----------------------------|----------------------------|-----------------------------|---------------|
| <b>1</b> | CH <sub>2</sub> Cl <sub>2</sub> (298 K) | 306, 359 and a tail to 448  | -                          | -                           | -             |
| <b>2</b> | CH <sub>2</sub> Cl <sub>2</sub> (298 K) | 310, 363 and a tail to 456  | -                          | -                           | -             |
| pbdtmi   | CH <sub>2</sub> Cl <sub>2</sub> (298 K) | 320                         | 409                        | 1.1 (85.5%),<br>3.4 (14.5%) | 89.9%         |

**Table S5** Luminescence data of **1**, **2** and pbdtmi in solid state at room temperature.

| Compound | $\lambda_{em}$ (nm) | Lifetime (ns)                                | quantum yield |
|----------|---------------------|----------------------------------------------|---------------|
| <b>1</b> | 579                 | 7789 (62.9%),<br>3008 (35.5%),<br>333 (1.6%) | 7.2%          |
| <b>2</b> | 551                 | 4362 (86.9%),<br>845 (12.5%),<br>59 (0.6%)   | 6.8%          |
| pbdtmi   | 393                 | 5.2 (80.6%),<br>0.5 (19.4%)                  | 1.0%          |

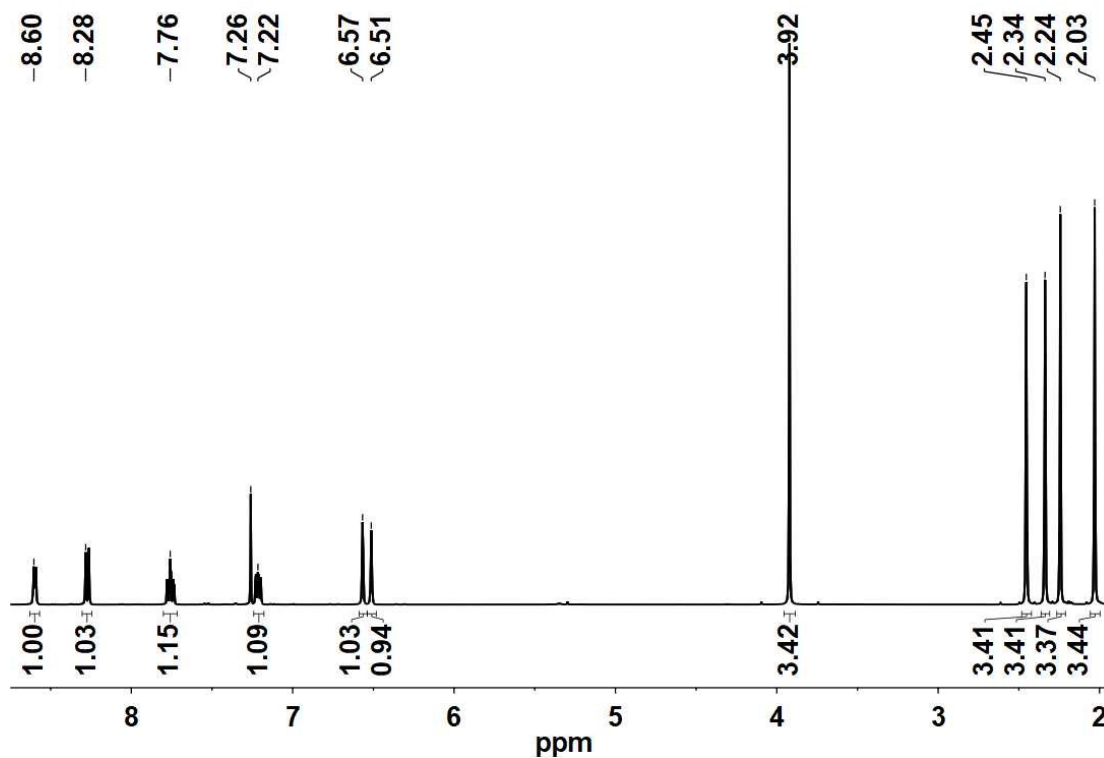

**Fig. S1** The  $^1\text{H}$  NMR of pbdtmi in  $\text{CDCl}_3$ .

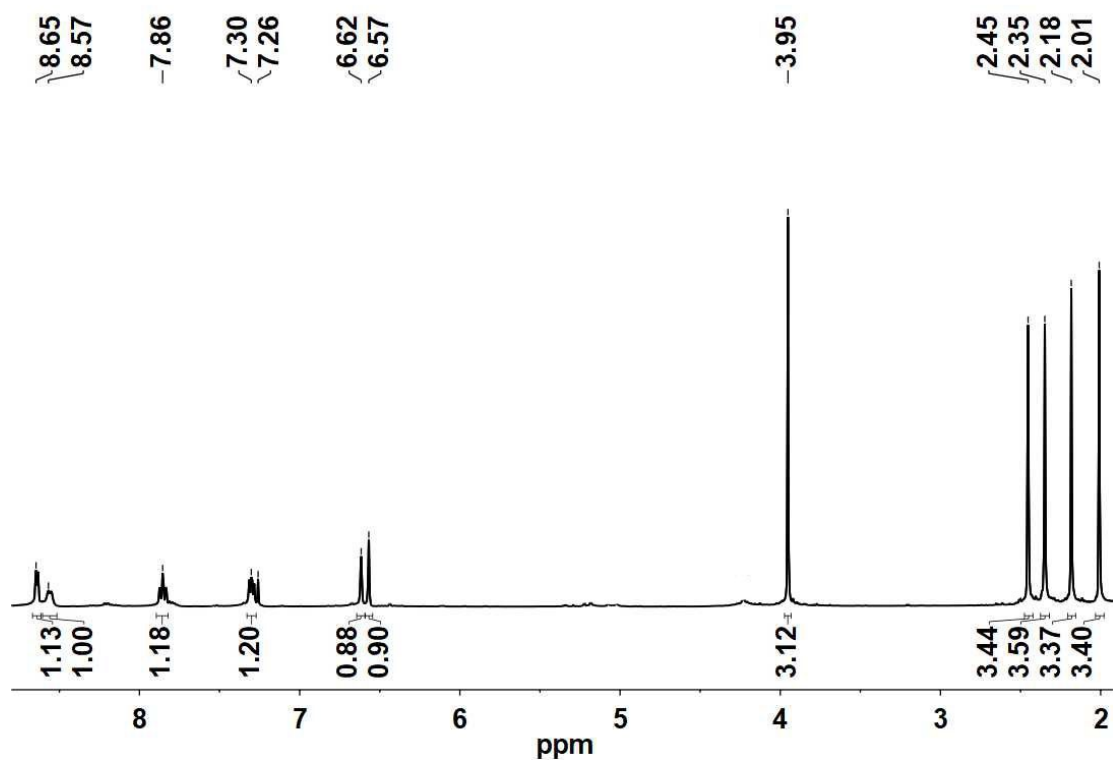

**Fig. S2** The  $^1\text{H}$  NMR of pbdtmi in  $\text{CDCl}_3$  after irradiation for 30 min under 365 nm light [ $\delta$  (ppm): 2.01-2.45 (4s, 12H from four  $-\text{CH}_3$  groups attached to two thiophene rings), 3.95 (s, 3H from a  $-\text{CH}_3$  group attached to the imidazole unit in pbdtmi), 6.57 and 6.62 (2s, 2H from two thiophene rings), 7.30 (t,  $J = 6.2$ , 1H), 7.86 (t,  $J = 7.8$ , 1H), 8.57 (d,  $J = 6.8$ , 1H) and 8.65 (d,  $J = 4.8$ , 1H) (7.30-8.65, total 4H from a pyridyl unit in pbdtmi).]

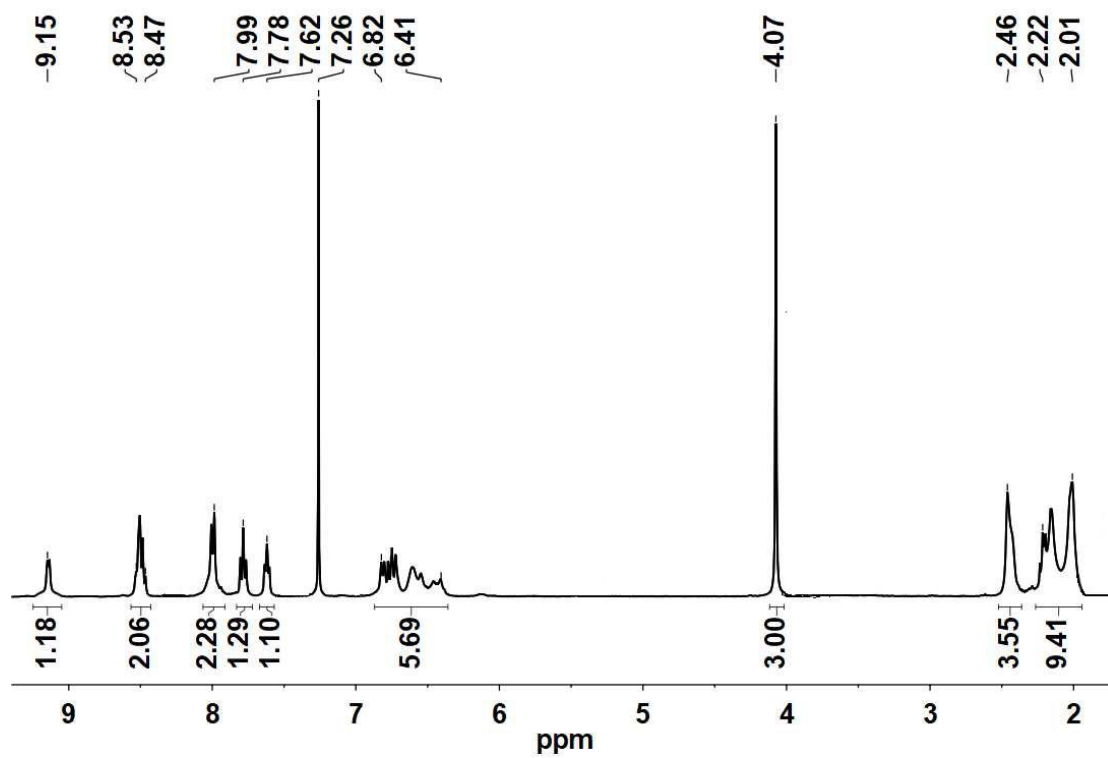

Fig. S3  $^1\text{H}$  NMR of 1 in  $\text{CDCl}_3$

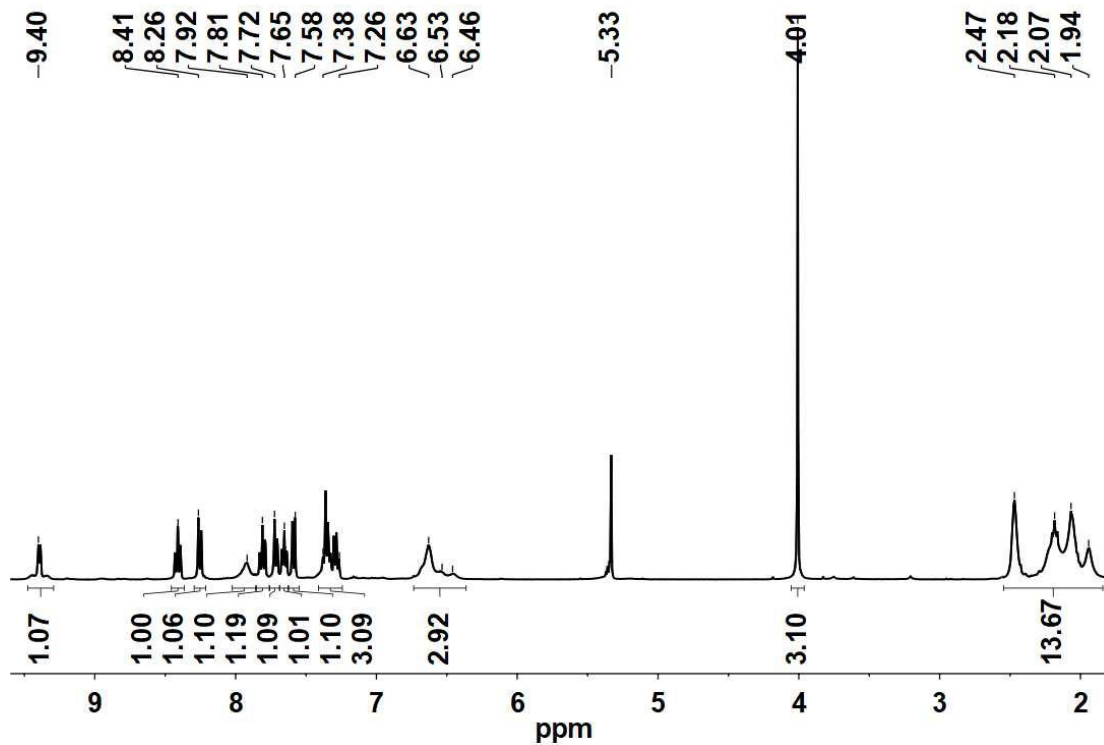

Fig. S4  $^1\text{H}$  NMR of 2 in  $\text{CD}_2\text{Cl}_2$ .

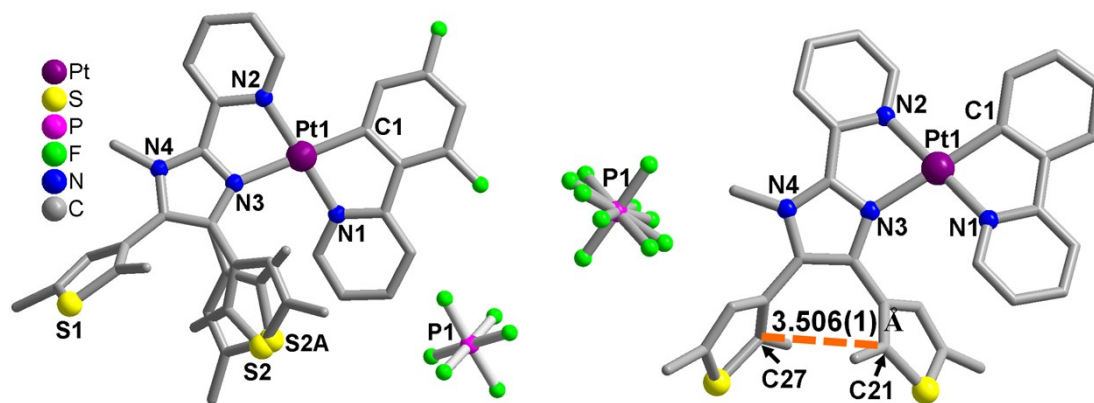

**Fig. S5** Molecular structures of **1** (left) and **2** (right). All H atoms attached to carbon atoms are omitted for clarity. One of two thiophene groups in **1** and the  $\text{PF}_6^-$  ion in **2** are disordered.

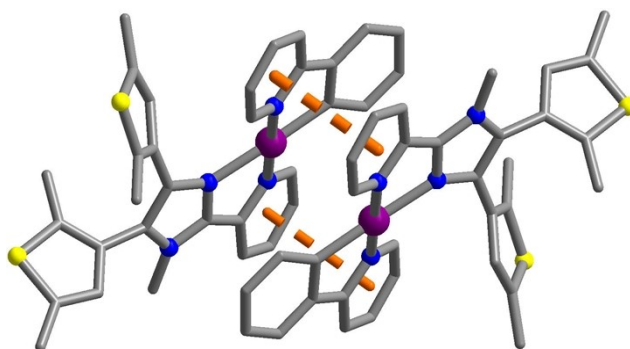

**Fig. S6** Supramolecular dimer structure in complex  $\mathbf{2} \cdot \text{C}_7\text{H}_8$ .

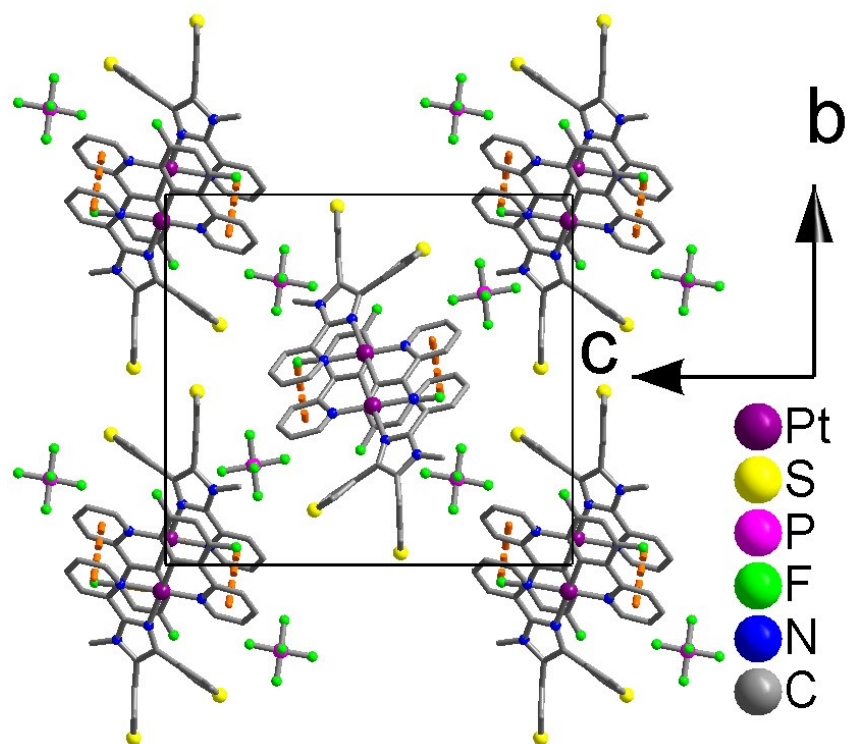

**Fig. S7** Packing structure of **1**. The disordered states of thiophene groups in this Fig. have not been shown for clarity.

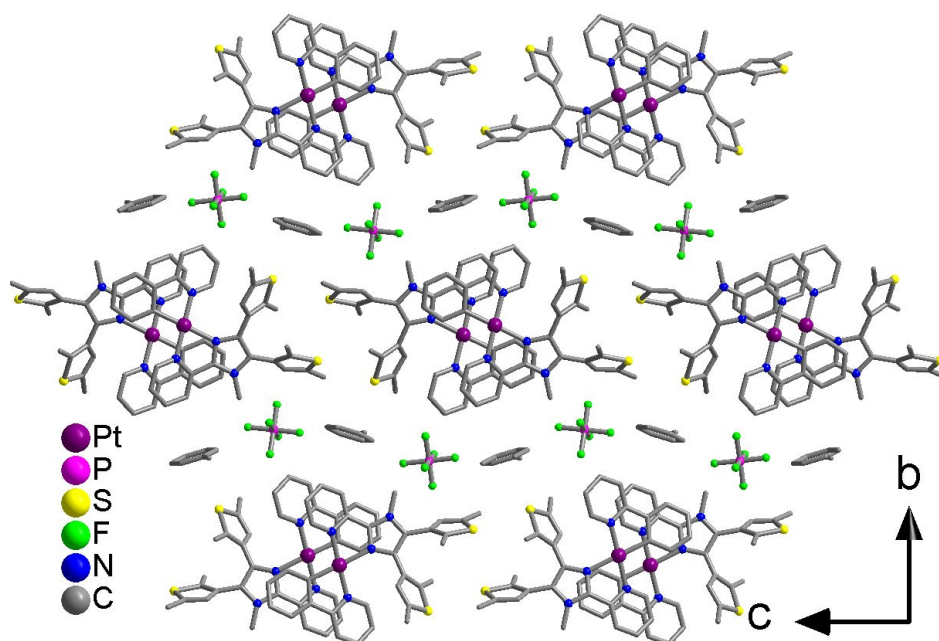

**Fig. S8** Packing structure of **2·C<sub>7</sub>H<sub>8</sub>**. The toluene molecules and PF<sub>6</sub><sup>-</sup> ions in this structure are disordered. However, their disordered states have not been shown in this figure for clarity.

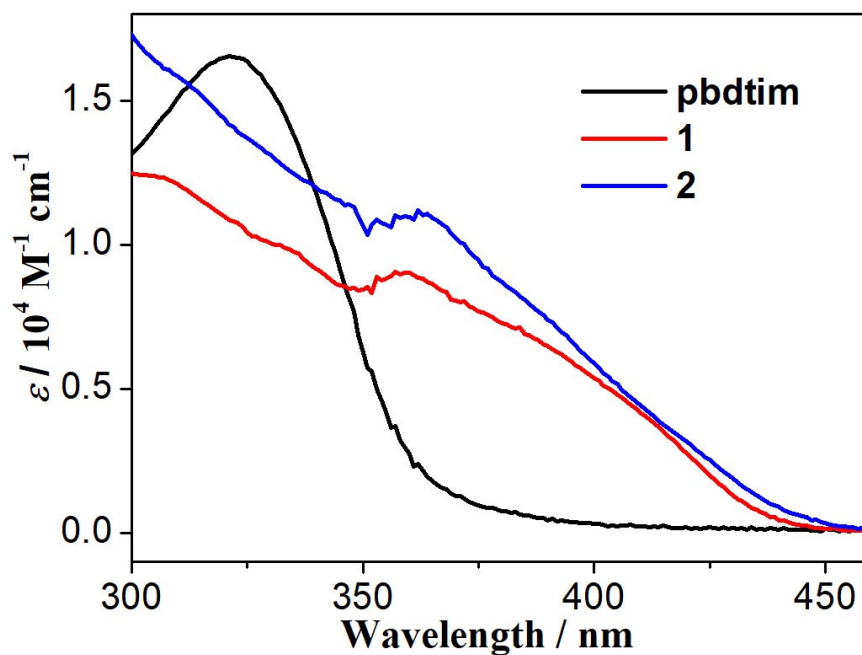

**Fig. S9** UV-vis spectra of pbdtim, 1 and 2 in CH<sub>2</sub>Cl<sub>2</sub>.

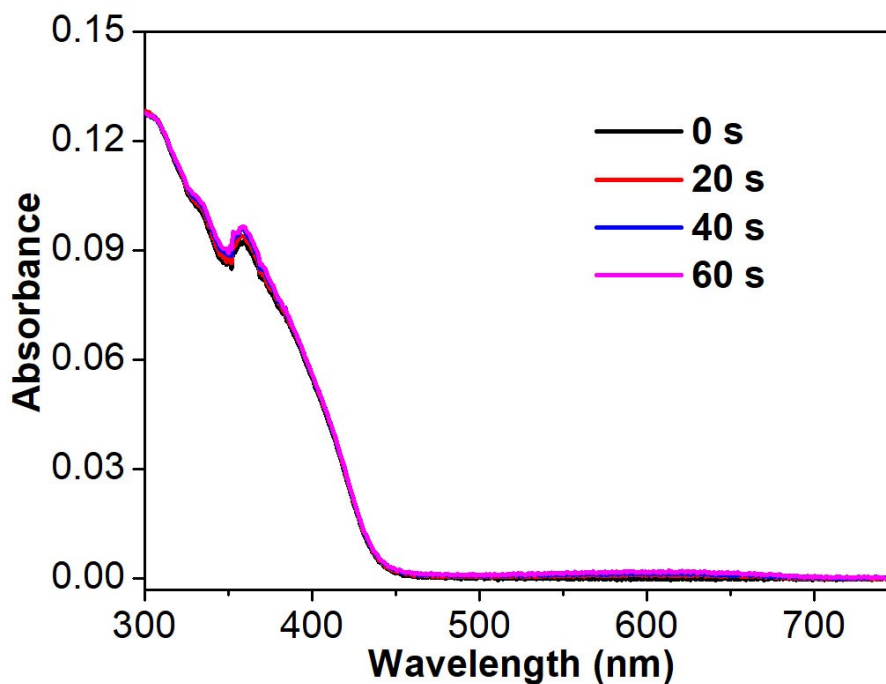

**Fig. S10** Absorption spectra changes of 1 in CH<sub>2</sub>Cl<sub>2</sub> solution (c = 1.0 × 10<sup>-5</sup> M) upon UV irradiation (λ = 365 nm) for 0–60 seconds.



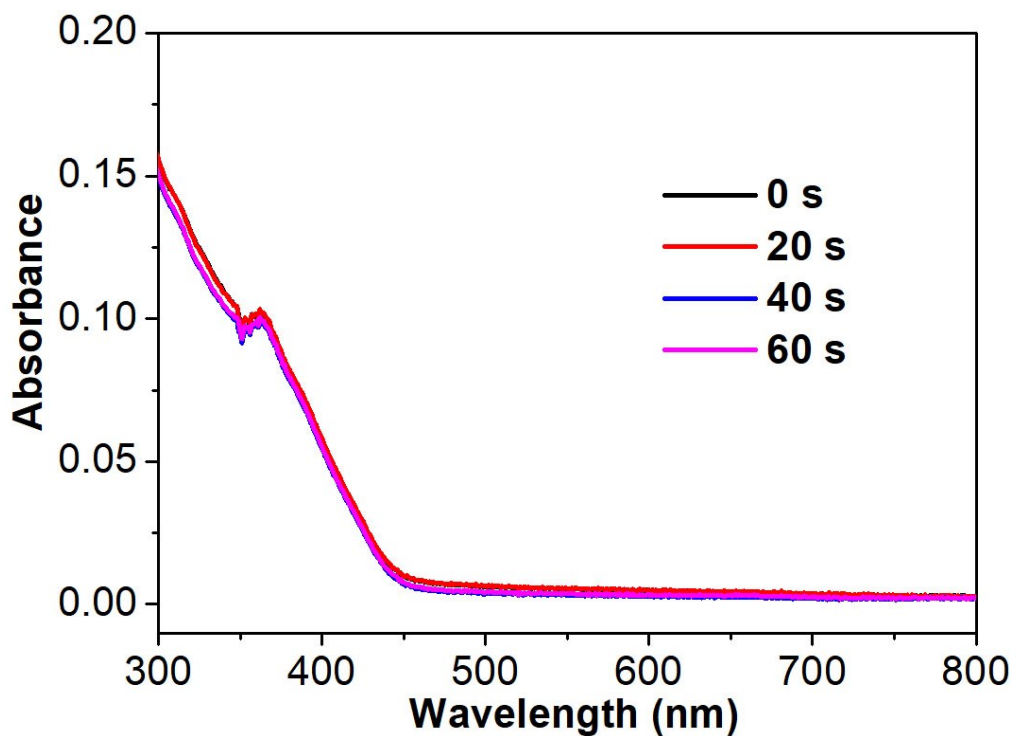

**Fig. S11** Absorption spectra changes of **2** in CH<sub>2</sub>Cl<sub>2</sub> solution ( $c = 1.0 \times 10^{-5}$  M) upon UV irradiation ( $\lambda = 365$  nm) for 0–60 seconds.

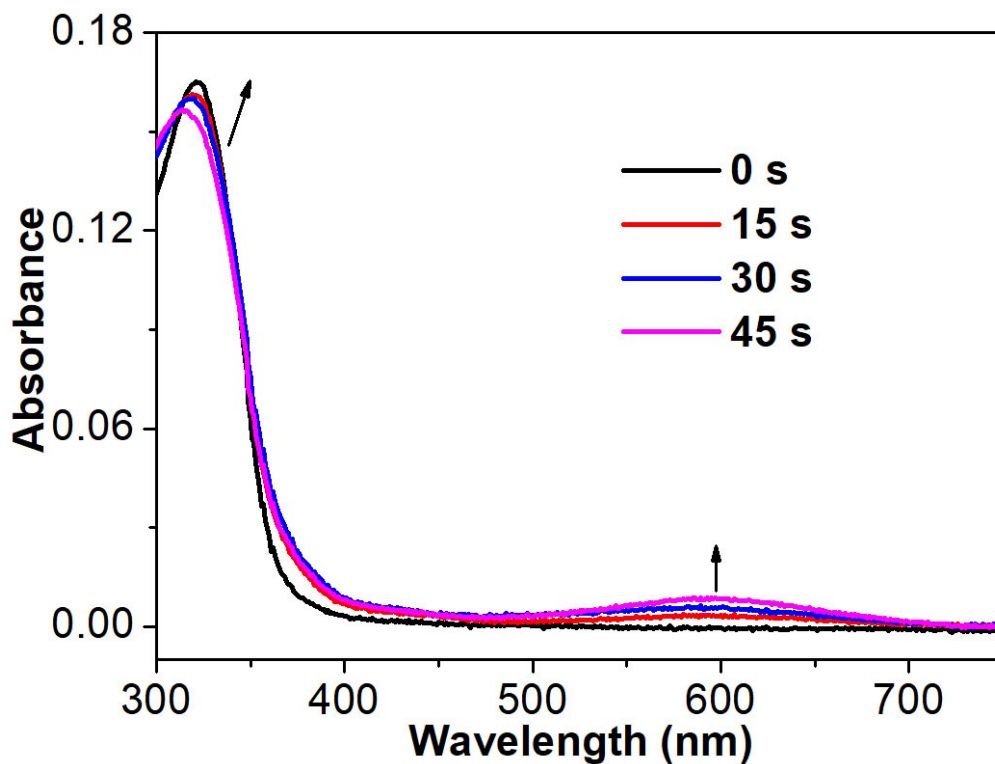

**Fig. S12** Absorption spectra changes of pbdmi in CH<sub>2</sub>Cl<sub>2</sub> solution ( $c = 1.0 \times 10^{-5}$  M) upon UV irradiation ( $\lambda = 325$  nm) for 0–45 seconds.

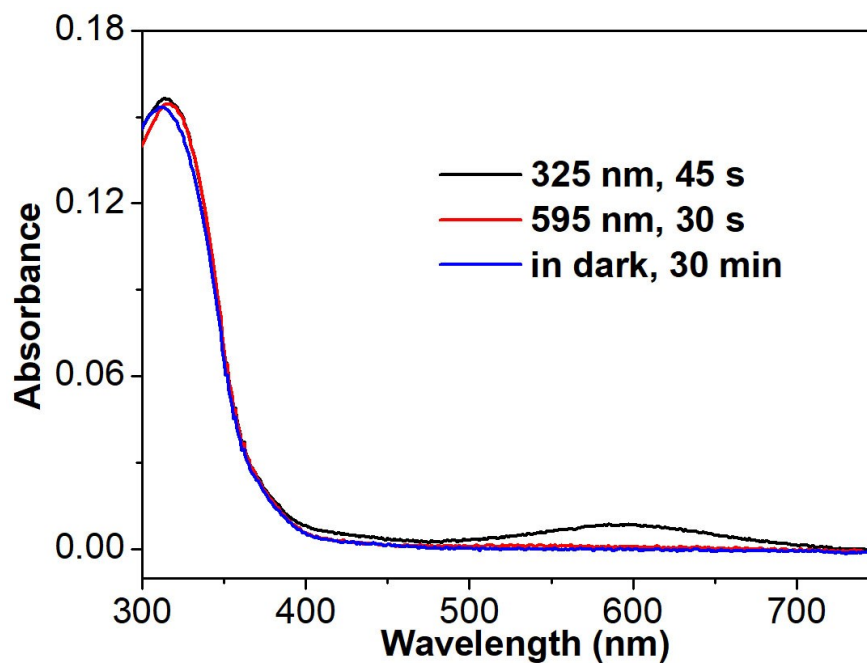

**Fig. S13** Black line: irradiating ( $\lambda = 325$  nm) the  $\text{CH}_2\text{Cl}_2$  solution of pbdtmi in  $\text{CH}_2\text{Cl}_2$  for 45 seconds; red line: irradiating ( $\lambda = 595$  nm) the solution corresponding to black line for 30 seconds; blue line: placing the solution corresponding to black line in the dark for 30 minutes.

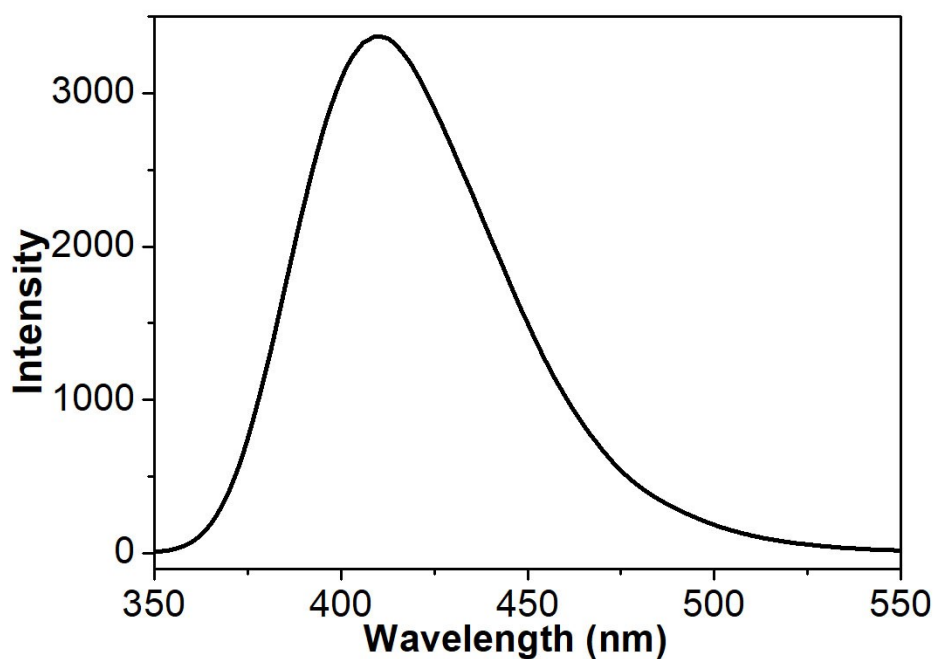

**Fig. S14** Luminescence spectrum of pbdtmi in  $\text{CH}_2\text{Cl}_2$  solution ( $c = 1.0 \times 10^{-4}$  M,  $\lambda_{\text{ex}} = 336$  nm).
